# Supplementary material
Source: PubMed Central journal article supplement (PMC10935612)
Supplement: NIHMS1604068-supplement-317254_Uncut_Gel_Blots.pdf [file NIHMS1604068-supplement-317254_Uncut_Gel_Blots.pdf]

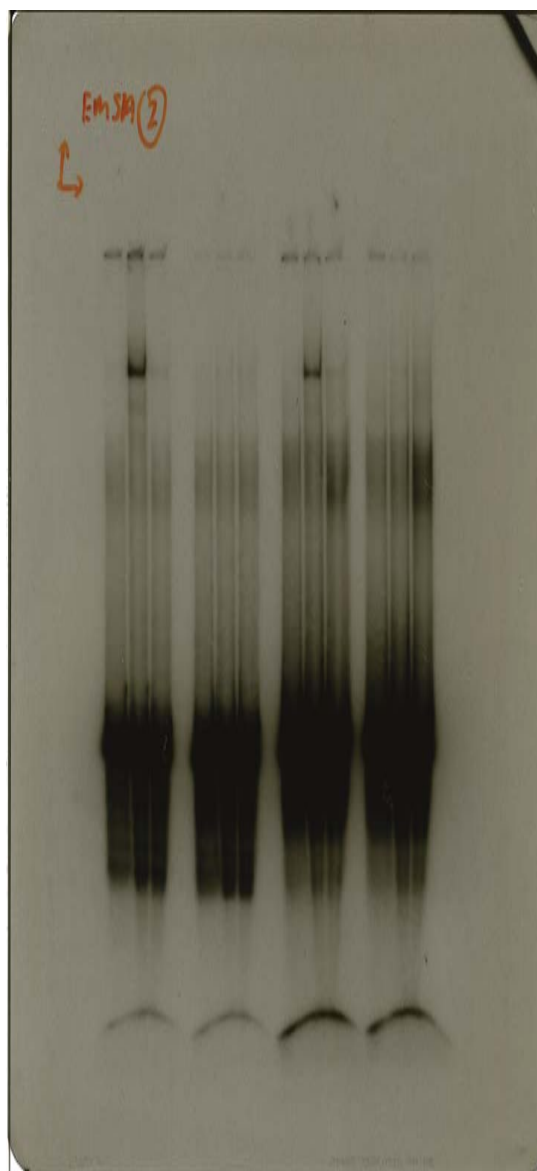

Full unedited gel for Figure 4E  
All lanes were used

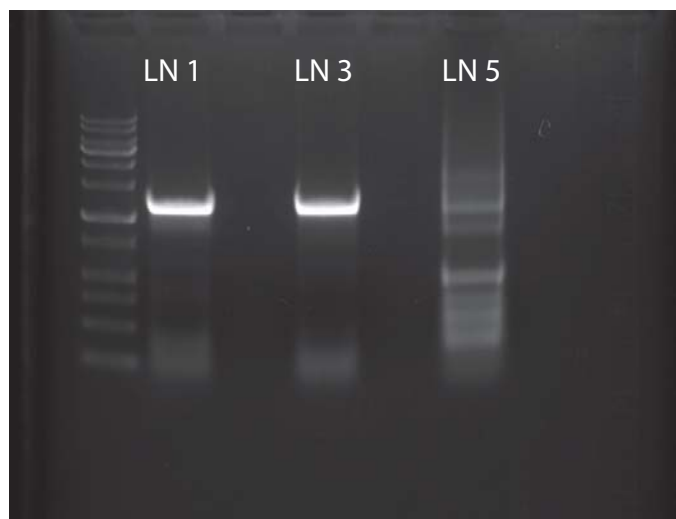

Full unedited gel for Figure S8A  
LN 3 corresponds to NTC  
LN5 corresponds to sgRNA pair
